# Supplementary material for: Antimicrobial resistance pattern of Escherichia coli isolated from imported frozen shrimp in Saudi Arabia
Source: PeerJ. 2024 Dec 20;12:e18689. doi: 10.7717/peerj.18689 (PMC11665426; doi:10.7717/peerj.18689)
Supplement: Supplemental Information 1 [file peerj-12-18689-s001.xlsx]

## Sheet: Sheet1
		Antimicrobial susceptibility testing																					Antibiotic resistance group
Isolates No	shrimp country of origin	AM	AK	AUG	ATM	CIP	CTX	CAZ	CRO	C	CFX	FOX	FM	GM	K	KF	NA	NOR	TN	PIP	SXT	TE	MDR	AB. Pattern
1	China	R	S	S	I	S	R	S	R	S	R	S	S	S	S	R	S	S	S	R	S	S	6	6a
2	China	R	S	S	S	S	R	S	I	S	R	S	S	S	S	R	S	S	S	R	S	S	5	5e
3	China	R	S	S	S	S	I	S	I	S	R	S	S	S	S	R	S	S	S	R	R	R	6	6d
4	China	R	S	S	R	R	R	S	R	S	R	S	S	S	S	R	R	R	R	R	R	R	13	13b
5	China	R	S	S	R	R	R	I	R	S	R	S	S	S	S	R	R	R	R	R	R	R	13	13b
6	China	R	S	S	I	S	R	S	R	S	R	S	S	S	R	R	S	S	S	R	S	S	7	7f
7	China	R	S	S	I	S	R	S	R	S	R	S	S	S	S	R	S	S	S	R	S	S	6	6a
8	China	R	S	S	I	S	R	S	R	S	R	S	S	S	S	R	S	S	S	R	S	S	6	6a
9	China	R	S	S	I	S	R	S	R	S	R	S	S	S	S	R	S	S	S	R	S	S	6	6a
10	China	R	S	S	I	S	R	S	R	S	R	S	S	S	S	R	S	S	S	R	S	S	6	6a
11	China	R	S	S	I	R	R	S	R	R	R	S	S	R	S	R	R	R	S	R	R	R	13	13g
12	China	R	S	S	I	R	R	S	R	R	R	S	R	S	S	R	R	R	S	R	R	R	13	13c
13	China	R	S	S	I	R	R	S	R	R	R	S	S	S	S	R	R	R	S	R	R	R	12	12a
14	China	R	S	S	I	R	R	S	R	R	R	S	S	S	S	R	R	R	S	R	R	R	12	12a
15	China	R	S	S	I	R	R	S	R	R	R	S	S	S	S	R	R	R	S	R	R	R	12	12a
16	China	R	S	S	I	R	R	S	R	R	R	S	S	S	S	R	R	R	S	R	R	R	12	12a
17	China	R	S	S	I	R	R	S	R	R	R	S	S	S	S	R	R	R	S	R	R	R	12	12a
18	China	R	S	S	I	R	R	S	R	R	R	I	R	S	S	R	R	R	S	R	R	R	13	13c
19	China	R	S	S	I	R	R	S	R	R	R	S	S	S	S	R	R	R	S	R	R	R	12	12a
20	China	R	S	S	I	R	R	S	R	R	R	R	S	S	S	R	R	R	S	R	R	R	13	13f
21	China	R	S	S	I	R	R	S	R	R	R	S	S	S	S	R	R	R	S	R	R	R	12	12a
22	China	R	S	S	I	R	R	S	R	R	R	S	S	S	S	R	R	R	S	R	R	R	12	12a
23	China	R	S	S	I	R	R	S	R	R	R	S	S	S	S	R	R	R	S	R	R	R	12	12a
24	China	R	S	S	I	R	R	S	R	R	R	S	S	S	S	R	R	R	S	R	R	R	12	12a
25	China	R	S	S	I	R	R	S	R	R	R	S	S	S	S	R	R	R	S	R	R	R	12	12a
26	China	R	S	S	I	S	S	S	S	S	S	S	S	S	S	R	S	S	S	S	S	S	2	2a
27	China	R	S	S	I	S	S	S	S	S	S	S	S	S	S	R	S	S	S	I	S	S	2	2a
28	China	R	S	S	I	S	S	S	S	S	S	S	S	S	S	R	S	S	S	S	S	S	2	2a
29	China	R	S	S	I	S	S	S	S	S	R	S	S	S	S	R	S	S	R	R	S	S	5	5d
30	China	R	S	S	I	S	S	S	S	S	R	S	S	S	S	R	S	S	S	R	S	S	4	4a
31	China	R	S	S	I	R	R	S	R	R	R	S	S	S	S	R	R	R	S	R	R	R	12	12a
32	China	R	S	S	I	R	R	S	R	R	R	S	S	S	S	R	R	R	S	R	R	R	12	12a
33	China	R	S	S	I	R	R	S	R	R	R	S	S	S	S	R	R	R	S	R	R	R	12	12a
34	China	R	S	S	I	R	R	S	R	R	R	S	S	S	S	R	R	R	S	R	R	R	12	12a
35	China	R	S	S	I	R	R	S	R	R	R	S	S	S	S	R	R	R	R	R	R	R	13	13d
36	China	R	S	S	S	S	S	S	S	S	S	S	S	S	S	R	S	S	S	S	S	S	2	2a
37	China	R	S	S	S	S	S	S	S	S	S	S	S	S	S	R	S	S	S	S	S	S	2	2a
38	China	R	S	S	I	R	R	S	R	R	R	S	S	S	S	R	R	R	S	R	R	R	12	12a
39	China	R	S	S	I	R	R	S	R	R	R	S	S	S	S	R	R	R	S	R	R	R	12	12a
40	China	R	S	S	I	R	R	S	R	R	R	S	S	S	S	R	R	R	S	R	R	R	12	12a
41	vietnam	R	S	S	S	S	R	S	R	S	R	S	S	S	S	R	S	S	S	R	R	R	8	8b
42	vietnam	R	S	S	S	S	R	S	R	S	R	S	S	S	S	R	S	S	S	R	R	R	8	8b
43	vietnam	R	S	S	S	R	R	S	R	R	R	S	S	S	S	R	R	R	S	R	R	R	12	12a
44	vietnam	R	S	S	S	S	R	S	R	R	R	S	S	R	S	R	S	S	S	R	S	R	9	9a
45	vietnam	R	S	S	S	S	I	S	I	R	R	S	S	R	S	R	S	S	S	R	S	R	7	7c
46	vietnam	R	S	S	I	S	R	S	R	S	R	S	S	S	S	R	S	S	S	R	S	S	6	6a
47	vietnam	R	S	S	I	S	R	S	R	S	R	S	S	S	S	R	S	S	S	R	R	R	8	8b
48	vietnam	R	S	S	I	S	R	S	R	S	R	S	R	S	S	S	S	S	S	R	S	S	6	6f
49	vietnam	R	S	S	I	S	R	S	R	S	R	S	R	S	S	S	S	S	S	R	R	S	7	7g
50	vietnam	R	S	S	I	S	R	S	R	S	R	S	S	S	S	S	S	S	R	R	R	R	8	8h
51	vietnam	R	S	S	S	S	S	S	I	R	I	S	S	R	S	R	S	S	S	I	S	R	5	5a
52	vietnam	R	S	S	S	S	R	S	S	R	R	S	S	R	S	R	S	S	S	R	S	R	8	8e
53	vietnam	R	S	S	S	S	I	S	R	R	R	S	S	R	S	R	R	S	S	R	R	R	10	10b
54	vietnam	R	S	S	S	I	I	S	I	R	R	S	S	R	S	R	R	S	S	R	R	R	9	9b
55	vietnam	R	S	S	S	S	I	S	I	R	R	S	S	R	S	R	R	S	S	R	R	R	9	9b
56	vietnam	R	S	S	I	S	R	S	R	R	R	S	R	S	S	R	S	S	S	R	R	R	10	10c
57	vietnam	R	S	S	I	S	R	S	R	S	R	S	S	S	S	R	S	S	S	R	R	R	8	8b
58	vietnam	R	S	S	I	S	R	S	R	S	R	S	S	S	S	R	S	S	S	R	R	R	8	8b
59	vietnam	R	S	S	I	S	I	S	I	S	R	S	S	S	S	R	S	S	S	R	S	S	4	4a
60	vietnam	R	S	S	I	S	R	S	R	R	R	S	S	S	S	R	S	S	S	R	S	S	7	7h
61	vietnam	R	S	S	S	S	S	S	S	R	R	S	S	I	S	R	S	S	I	I	S	R	5	5f
62	vietnam	R	S	S	S	S	S	S	S	S	R	S	S	R	S	R	S	S	S	I	S	R	5	5g
63	vietnam	R	S	S	S	S	S	S	S	R	R	S	S	R	S	R	S	S	S	R	S	R	7	7c
64	vietnam	R	S	S	S	S	S	S	I	R	I	S	S	R	S	R	S	S	S	I	S	R	5	5a
65	vietnam	R	S	S	S	S	S	S	S	R	S	S	S	R	S	R	S	S	S	I	S	R	5	5a
66	vietnam	R	S	S	I	S	R	S	R	S	R	S	S	S	S	R	S	S	S	R	S	S	6	6a
67	vietnam	R	S	S	I	S	R	S	R	S	R	S	S	S	S	R	S	S	S	R	S	S	6	6a
68	vietnam	R	S	S	I	S	R	S	R	S	R	S	S	S	S	R	S	S	S	R	S	S	6	6a
69	vietnam	R	S	S	I	S	R	S	R	S	R	S	S	S	S	R	S	S	S	R	S	S	6	6a
70	vietnam	R	S	S	I	S	R	S	R	S	R	S	S	S	S	R	S	S	S	R	S	S	6	6a
71	vietnam	R	S	S	I	S	R	S	R	R	R	S	S	R	S	R	S	S	R	S	S	R	9	9d
72	vietnam	R	S	S	I	S	R	S	R	R	R	S	S	R	S	R	S	S	S	R	S	R	9	9a
73	vietnam	R	S	S	I	S	R	S	R	R	R	S	S	R	S	R	S	S	S	R	S	R	9	9a
74	vietnam	R	S	S	I	S	R	S	R	R	R	S	S	R	S	R	S	S	I	R	R	R	10	10a
75	vietnam	R	S	S	I	S	R	S	R	R	R	S	S	R	S	R	S	S	I	R	R	R	10	10a
76	vietnam	R	S	S	I	S	R	S	R	R	R	S	S	R	S	R	S	S	R	R	R	R	11	11b
77	vietnam	R	S	S	S	S	R	S	R	R	R	S	S	R	S	R	S	S	R	R	R	R	11	11b
78	vietnam	R	S	S	S	S	R	S	I	R	R	S	S	R	S	R	S	S	R	R	R	R	10	10d
79	vietnam	R	S	S	S	S	I	S	I	R	R	S	S	R	S	R	S	S	R	R	R	R	9	9e
80	vietnam	R	S	S	S	I	S	S	I	R	R	S	S	R	S	R	R	I	R	R	R	R	10	10e
81	China	R	S	S	I	R	I	S	I	S	R	S	S	S	S	R	R	R	S	R	S	S	7	7a
82	China	R	S	S	I	R	I	S	I	S	R	S	S	S	S	R	R	R	S	R	S	S	7	7a
83	China	R	S	S	I	R	I	S	I	S	R	S	S	S	S	R	R	R	S	R	S	S	7	7a
84	China	R	S	S	I	R	I	S	I	S	R	S	S	S	S	R	R	R	S	R	S	S	7	7a
85	China	R	R	S	I	R	I	S	I	S	R	S	S	S	S	R	R	R	S	R	S	S	8	8f
86	China	R	S	S	I	R	I	S	I	S	R	S	S	S	S	R	S	R	S	R	S	S	6	6g
87	China	R	S	S	I	R	I	S	R	S	R	S	S	S	S	R	R	R	S	R	S	S	8	8a
88	China	R	S	S	I	R	I	S	R	S	R	S	S	S	S	R	R	R	S	R	S	S	8	8a
89	China	R	S	S	I	R	I	S	R	S	R	S	S	S	S	R	R	R	S	R	S	S	8	8a
90	China	R	S	S	I	R	I	S	R	S	R	S	S	S	S	R	R	R	S	R	S	S	8	8a
91	China	R	S	S	I	R	I	S	R	S	R	S	S	S	S	R	R	R	S	R	S	S	8	8a
92	China	R	S	S	I	R	I	S	R	S	R	S	S	S	S	R	R	R	S	R	S	S	8	8a
93	China	R	S	S	I	R	I	S	I	S	R	S	S	S	S	R	R	R	S	R	S	S	7	7a
94	China	R	S	S	I	R	I	S	R	S	R	S	S	S	S	R	R	R	S	S	R	S	8	8i
95	China	S	S	S	I	R	I	S	R	S	R	S	S	S	S	R	R	R	S	R	S	S	7	7e
96	China	R	S	S	I	R	I	S	I	S	R	S	S	S	S	R	R	R	S	R	S	S	7	7a
97	China	R	S	S	I	R	I	S	R	S	R	S	S	S	S	R	R	R	S	R	S	S	8	8a
98	China	R	S	S	I	R	I	S	I	S	R	S	S	S	S	R	R	R	S	R	S	S	7	7a
99	China	R	S	S	I	R	I	S	R	S	R	S	S	S	S	R	R	R	S	R	S	S	8	8a
100	China	R	S	S	I	R	I	S	R	S	R	S	S	S	S	R	R	R	S	R	S	S	8	8a
101	China	I	S	S	S	S	S	S	S	S	R	S	S	S	S	S	S	S	S	S	S	S	1	1b
102	China	R	S	S	S	S	S	S	S	S	R	S	S	S	S	R	S	S	S	R	S	S	4	4a
103	China	I	S	S	S	S	S	S	S	S	R	S	S	S	S	R	S	S	S	R	S	S	3	3a
104	China	I	S	S	S	S	S	S	S	S	R	S	S	S	S	R	S	S	S	R	S	S	3	3a
105	China	I	S	S	S	S	S	S	S	S	R	S	S	S	S	R	S	S	S	R	S	S	3	3a
106	China	R	S	S	I	R	I	S	I	S	S	S	S	S	S	R	R	R	R	R	S	R	8	8d
107	China	R	S	S	I	R	I	S	I	S	S	S	S	S	S	R	R	R	R	R	S	R	8	8d
108	China	R	S	S	I	R	I	S	I	S	S	S	S	S	S	R	R	R	R	R	S	R	8	8d
109	China	R	S	S	I	R	I	S	I	S	S	S	S	S	S	R	R	R	R	R	S	R	8	8d
110	China	I	S	S	S	S	S	S	S	S	I	S	S	S	S	R	S	S	S	S	S	S	1	1a
111	China	R	S	S	R	R	I	R	R	S	R	S	S	R	S	R	R	R	R	R	R	R	14	14a
112	China	R	S	S	R	R	I	R	R	S	R	S	S	R	S	R	R	R	R	R	R	R	14	14a
113	China	R	S	S	R	R	I	R	R	S	R	S	S	R	S	R	R	R	R	R	R	R	14	14a
114	China	R	S	S	R	R	I	R	R	S	R	S	S	R	S	R	R	R	R	R	R	R	14	14a
115	China	R	S	S	R	R	I	R	R	S	R	S	S	R	S	R	R	R	R	R	R	R	14	14a
116	China	R	S	S	R	R	I	R	R	S	R	S	S	R	S	R	R	R	R	R	R	R	14	14a
117	China	R	S	S	R	R	I	R	R	S	R	S	S	R	S	R	R	R	R	R	R	R	14	14a
118	China	R	S	S	R	R	I	R	R	S	R	S	S	S	S	R	R	R	R	R	R	R	13	13e
119	China	R	S	S	I	R	S	S	R	S	R	S	S	S	S	R	R	R	S	R	S	S	8	8a
120	China	R	S	S	I	R	I	S	R	S	R	S	S	S	S	R	R	R	S	R	S	S	8	8a
121	China	R	S	S	I	R	I	S	I	S	R	S	S	S	S	R	R	R	S	R	S	S	7	7a
122	China	R	S	S	I	R	I	S	I	S	R	S	S	S	S	R	R	R	S	R	S	S	7	7a
123	China	R	S	S	I	I	S	S	I	S	R	S	S	S	S	R	R	R	S	R	S	S	6	6h
124	China	S	S	S	S	S	S	S	S	S	R	R	R	S	S	R	S	S	I	S	S	S	4	4b
125	China	S	S	S	S	S	S	S	S	S	R	R	R	S	S	R	S	I	S	S	S	S	4	4b
126	China	R	S	S	I	R	S	S	R	R	R	S	S	S	S	R	R	R	S	R	R	R	11	11a
127	China	R	S	S	I	R	S	S	R	R	R	S	S	S	S	R	R	R	S	R	R	R	11	11a
128	China	R	S	S	R	R	R	S	R	R	R	S	S	S	S	R	R	R	I	R	R	R	13	13a
129	China	R	S	S	R	R	R	S	R	R	R	S	S	S	S	R	R	R	I	R	R	R	13	13a
130	China	R	S	S	I	R	I	S	R	R	R	S	S	S	S	R	R	R	I	R	R	R	11	11a
131	China	R	S	S	I	R	R	S	R	I	R	S	S	S	S	R	R	R	S	R	R	R	11	11c
132	China	R	S	S	I	R	R	S	R	I	R	S	S	S	S	R	R	R	S	R	R	R	11	11c
133	China	R	S	S	R	R	I	S	R	I	R	R	R	S	S	R	R	R	S	S	R	R	12	12c
134	China	R	S	S	R	R	S	S	S	I	R	S	S	S	S	R	R	R	S	R	R	R	10	10f
135	China	R	S	S	R	R	S	S	S	I	R	R	R	S	S	R	S	R	S	R	R	R	11	11d
136	China	R	S	S	I	S	R	S	R	S	R	S	S	S	S	R	S	S	S	R	R	R	8	8b
137	China	S	S	S	S	S	S	S	S	R	R	R	R	S	S	R	S	S	S	S	S	S	5	5c
138	China	R	S	S	I	S	S	S	R	S	R	S	S	S	S	R	S	S	S	R	R	R	7	7b
139	China	R	S	S	I	S	R	S	R	S	R	S	S	S	S	R	S	S	S	R	R	R	8	8b
140	China	R	S	S	I	S	I	S	R	S	R	S	S	S	S	R	S	S	S	R	R	S	6	6e
141	China	R	S	S	I	S	I	S	R	S	R	S	S	S	S	R	S	S	S	R	R	R	7	7b
142	China	R	S	S	R	S	S	S	S	R	R	R	R	S	S	R	R	S	S	S	R	S	9	9f
143	China	R	S	R	R	S	I	S	S	R	R	R	R	S	S	R	R	S	S	S	R	S	10	10g
144	China	R	S	S	I	S	R	S	R	S	R	S	S	S	S	R	S	S	S	R	R	R	8	8b
145	China	R	S	S	I	S	I	S	R	S	R	S	S	S	S	R	S	S	S	R	R	R	7	7b
146	China	R	S	S	R	S	I	S	R	S	R	S	S	S	S	R	S	S	S	R	R	R	8	8j
147	China	R	S	S	R	S	R	S	R	S	R	S	S	S	S	S	S	S	S	R	R	R	8	8m
148	China	R	S	S	I	S	I	S	R	S	R	S	S	S	S	R	S	S	I	R	R	R	7	7b
149	China	R	S	S	I	S	I	S	R	S	R	S	S	S	S	R	S	S	I	R	R	R	7	7b
150	China	R	S	S	R	S	I	S	R	S	R	S	S	S	S	R	R	S	S	R	R	S	8	8c
151	China	R	S	S	R	S	I	S	R	S	R	S	S	S	S	R	R	S	S	R	R	S	8	8c
152	China	R	S	S	R	S	I	S	R	S	R	S	S	S	S	R	R	S	S	R	R	S	8	8c
153	China	R	S	S	R	S	I	S	R	S	R	S	S	S	S	R	R	S	S	R	R	S	8	8c
154	China	R	S	S	I	S	S	S	R	S	R	S	S	S	S	R	R	S	S	R	R	S	7	7d
155	China	R	S	S	I	S	S	S	R	S	R	S	R	S	S	R	R	S	I	R	R	S	8	8k
156	China	R	S	S	R	R	I	S	R	S	R	S	S	S	S	R	R	R	S	R	S	S	9	9c
157	China	R	S	S	I	R	S	S	R	S	R	S	S	S	S	R	R	R	S	R	S	S	8	8a
158	China	R	S	S	R	R	I	S	R	S	R	S	S	S	S	R	R	R	S	R	S	S	9	9c
159	China	R	S	S	S	R	S	S	I	S	R	S	S	S	S	R	R	R	S	R	S	S	7	7a
160	China	R	S	S	I	R	I	R	I	S	R	S	S	S	S	R	R	R	S	R	S	S	8	8g
161	China	R	S	S	I	S	I	S	R	S	R	S	S	S	S	R	R	S	S	R	R	S	7	7d
162	China	R	S	S	R	S	I	I	R	S	R	S	S	S	S	R	R	S	S	R	R	S	8	8c
163	China	R	S	S	R	S	S	S	R	S	R	S	S	S	S	R	R	S	S	R	R	S	8	8c
164	China	R	S	S	R	S	S	S	R	S	R	S	S	S	S	R	R	S	S	R	R	S	8	8c
165	China	R	S	S	R	S	I	R	R	S	R	S	S	S	S	R	R	S	S	R	R	S	9	9g
166	China	S	S	S	S	S	I	S	R	S	R	S	S	S	S	R	R	S	S	R	R	S	6	6c
167	China	R	S	S	R	S	S	I	R	S	R	S	S	S	S	R	R	S	S	R	R	S	8	8c
168	China	R	S	S	I	S	R	S	R	S	R	S	S	S	S	R	S	S	S	R	S	S	6	6a
169	China	R	S	S	I	S	R	S	R	S	R	S	S	S	S	R	S	S	S	R	S	S	6	6a
170	China	S	S	S	S	S	S	S	S	S	S	S	S	S	S	R	S	S	I	S	S	S	1	1a
171	China	R	S	S	R	S	R	S	R	S	R	S	S	S	S	R	S	S	I	R	S	S	7	7i
172	China	R	S	S	R	S	I	S	R	S	R	S	S	S	S	R	S	S	S	R	S	S	6	6b
173	China	R	S	S	I	S	R	S	R	S	R	S	S	S	S	R	S	S	I	R	S	S	6	6a
174	China	S	S	S	S	S	S	S	S	S	S	S	S	S	S	R	S	S	S	S	S	S	1	1a
175	China	S	S	S	S	S	S	S	S	S	S	S	S	S	S	R	S	S	S	S	S	S	1	1a
176	China	R	S	S	R	S	S	S	R	S	R	S	S	S	S	R	S	S	S	R	S	S	6	6b
177	China	R	S	S	R	S	I	S	R	S	S	S	S	S	S	S	S	S	R	S	S	S	4	4c
178	China	R	S	S	R	S	I	S	R	S	R	S	S	S	S	R	S	S	S	R	S	S	6	6b
179	China	R	S	S	I	S	I	S	R	S	R	S	S	S	S	R	S	S	S	R	S	S	5	5b
180	China	R	S	S	I	S	I	S	R	S	R	S	S	S	S	R	S	S	I	R	S	S	5	5b

## Sheet: Sheet2
25 ug	AM - AMPICILLIN
30 ug	AK - AMIKACIN	AM	AK	AUG	ATM	CIP	CTX	CAZ	CRO	C	CFX	FOX	FM	GM	K	KF	NA	NOR	TN	PIP	SXT	TE
30 ug	AUG - AUGMENTIN	92.7	0.5	0.5	19.4	42.7	39.4	5.5	68.3	30.5	90.5	4.4	7.2	16.1	0.5	96.6	52.7	43.3	13.3	86.6	50	48.8
30 ug	ATM - AZTREONAM	167	1	1	35	77	71	10	123	55	163	8	13	29	1	174	95	78	24	156	90	88
5 ug	CIP - CIPROFLOXACIN
30 ug	CAZ- CEFTAZIDIME
30 ug	CTX - CEFOTAXIME
30 ug	CRO - CEFTRIAXONE
30 ug	FOX -CEFOXITIN
30 ug	C - CHLORAMPHENICOL
30 ug	CFX - CEPHALEXIN
300 ug	KF - CEPHALOTIN
10 ug	GM - GENTAMICIN
30 ug	K - KANAMYCIN
30 ug	NA - NALIDIXIC ACID
30 ug	FM - NITROFURANTOIN
10 ug	NOR - NOROXIN
10 ug	PIP - PIPERACILLIN
100 ug	TN - TOBRAMYCIN
25 ug	TE - TETRACYCLINE
30 ug	SXT - TRIMETROPHRIM/SULPHAMETHOXAZOLE

## Sheet: Sheet3
	Vietnam																			Overlap				China
	5a	5f	5g	6f	7c	7g	7h	8e	8h	9a	9b	9d	9e	10a	10b	10c	10d	10e	11b	4a	6a	8b	12a	1a	1b	2a	3a	4b	4c	5b	5c	5d	5e	6b	6c	6d	6e	6g	6h	7a	7b	7d	7e	7f	7i	8a	8c	8d	8f
	1.6	0.5	0.5	0.5	1.1	0.5	0.5	0.5	0.5	1.6	1.1	0.5	0.5	1.1	0.5	0.5	0.5	0.5	1.1	1.6	7.7	4.4	10.5	2.2	0.5	2.7	1.6	1.1	0.5	1.1	0.5	0.5	0.5	1.6	0.5	0.5	0.5	0.5	0.5	5.5	2.7	1.1	0.5	0.5	0.5	6.6	4.4	2.2	0.5
	3	1	1	1	2	1	1	1	1	3	2	1	1	2	1	1	1	1	2	3	14	8	19	4	1	5	3	2	1	2	1	1	1	3	1	1	1	1	1	10	5	2	1	1	1	12	8	4	1
[truncated: 22 more columns]
